# Supplementary material
Source: publisher figshare collection journal article supplement (https://aacr.figshare.com/articles/dataset/_/22428180)
Supplement: Supplementary file 1 [file 39874509]

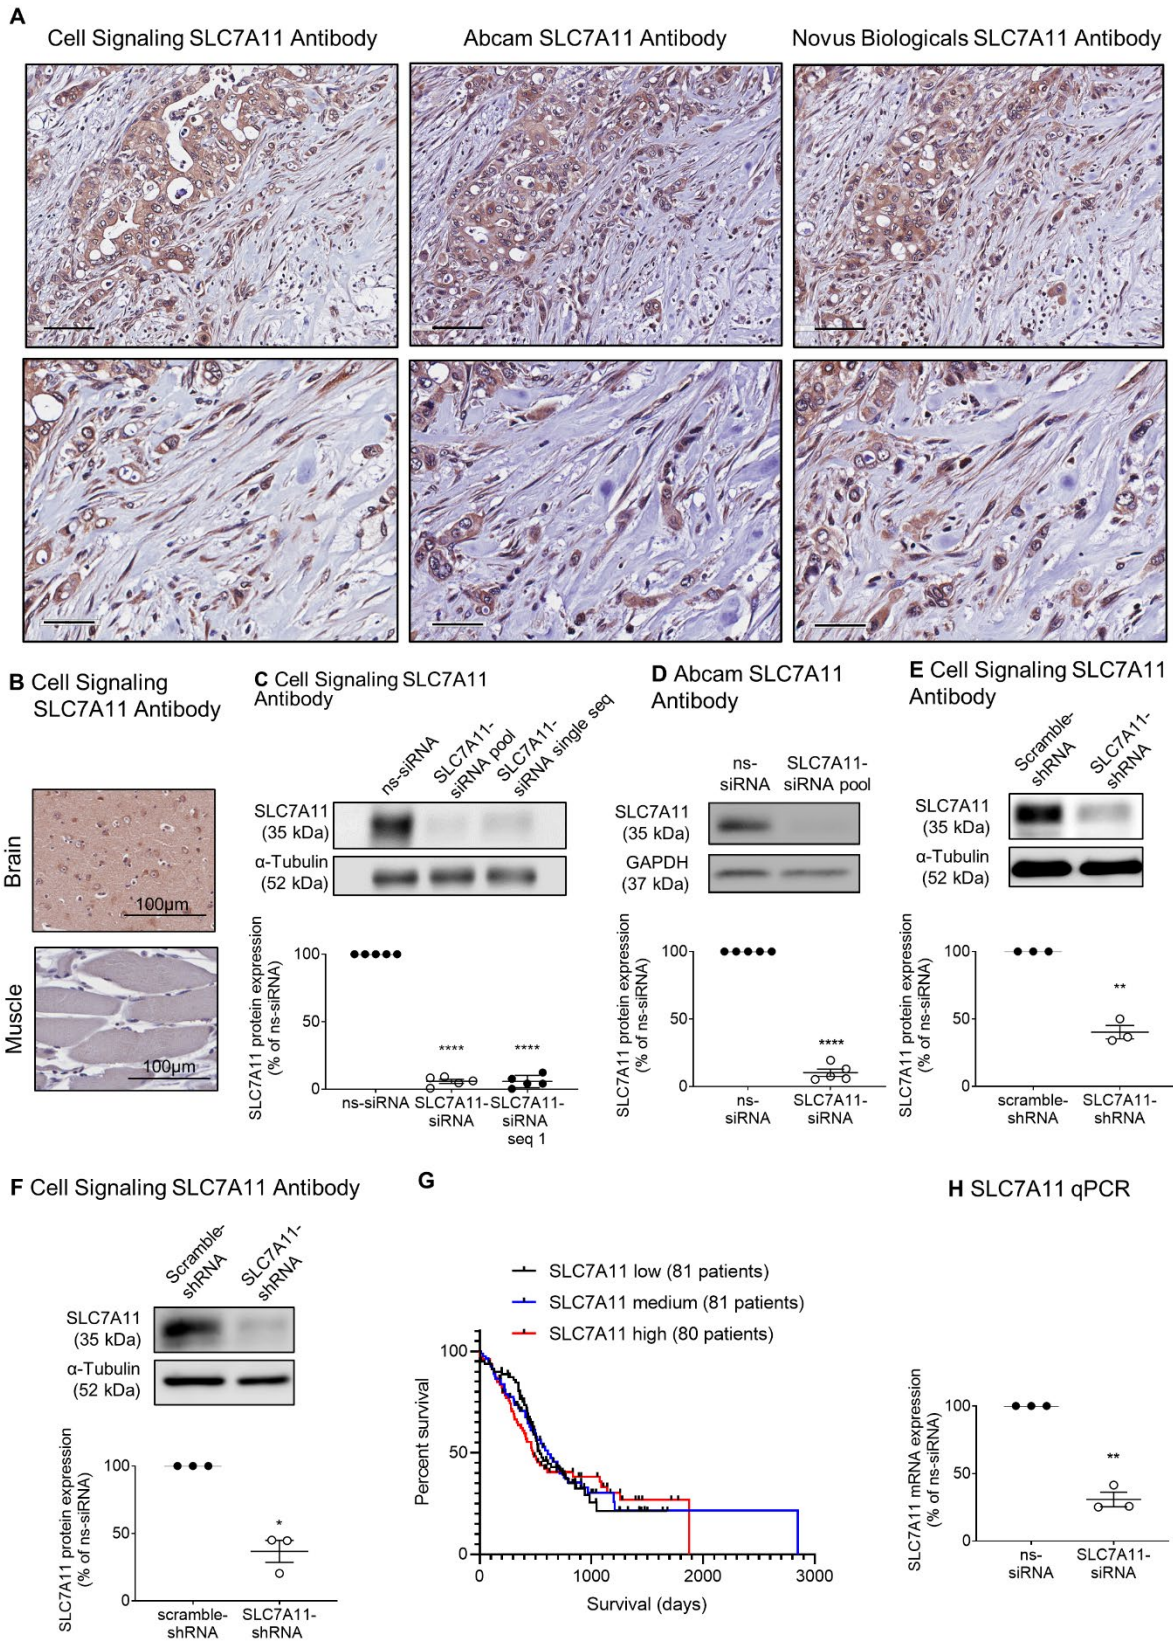

**Figure S1**

**Figure S1: Validation of SLC7A11 antibodies and SLC7A11 knockdown in CAFs and PDAC cells *in vitro*.** A) Comparison of immunohistochemistry for SLC7A11 in APGI ICGC PDAC patient tumour tissue using 3 different antibody clones from Cell Signaling, Abcam and Novus Biologicals. All antibodies showed a similar staining pattern. B) SLC7A11 Cell Signaling antibody detected high levels of SLC7A11 in brain tissue (positive) and low levels in skin (negative control) by IHC in the APGI ICGC cohort. This is consistent with relative expression levels for the tissues detailed in the human protein atlas. C-D) Representative Western blot [using (C) Cell Signaling or (D) Abcam antibodies] and densitometry of SLC7A11 in total protein extracts from CAFs, 72h after transfection with control siRNA (ns-siRNA), SLC7A11-siRNA pool or SLC7A11-siRNA single sequence (SLC7A11-siRNA single seq).  $\alpha$ -tubulin or GAPDH were used as loading controls. Circles indicate independent CAF cell lines, lines indicate mean $\pm$ s.e.m., asterisks indicate significance (\*\*\*\* $p\leq 0.0001$ ,  $n=5$ ; C=One-way ANOVA, E=student t-test). Knockdown was detected by both antibodies, demonstrating their specificity for SLC7A11. E-F) As per (D) except total protein extracts from CAFs (E) and MiaPaCa-2 PDAC cells (F) stably expressing scramble-shRNA or SLC7A11-shRNA were used (\* $p\leq 0.05$ , \*\* $p\leq 0.01$ ; student t-test). The antibody was able to detect specific gene silencing, confirming its specificity for SLC7A11. G) SLC7A11 mRNA expression in the ICGC PDAC cohort does not predict patient survival. Expression array data for SLC7A11 was analysed in PDAC patients from the APGI ICGC cohort. Patients were broken into tertiles based on SLC7A11 expression (low, medium, high) and correlated with overall patient survival. Kaplan-Meier survival curves are shown. Curves were not significantly different. H) Quantitative real-time PCR analysis of SLC7A11 silencing in total RNA extracts from CAFs, 72h post-transfection with ns-siRNA or SLC7A11-siRNA pool. Circles indicate replicates, lines indicate mean $\pm$ s.e.m., asterisks indicate significance (\*\* $p\leq 0.01$ ,  $n=3$ ; student t-test).
